# Supplementary material for: Monitoring of B Cell in Kidney Transplantation: Development of a Novel Clusters Analysis and Role of Transitional B Cells in Transplant Outcome
Source: PubMed Central journal article supplement (PMC8065535; doi:10.3390/diagnostics11040641), 2021-04-01
Supplement: diagnostics-11-00641-s001.pdf [file diagnostics-11-00641-s001.pdf]

**Table 1.** Cluster B lymphocyte levels at pre-transplantation.

| Subpopulations       | Cluster   |           |           | <i>P</i> <sup>a</sup>   |
|----------------------|-----------|-----------|-----------|-------------------------|
|                      | A1 (%)    | A2 (%)    | A3 (%)    |                         |
| <b>B Lymphocytes</b> | 6.02±3.01 | 8.94±5.29 | 8.60±3.61 | 0.370                   |
| Naive LB             | 52.6±13.9 | 70.2±5.62 | 84.6±6.74 | <0.001 <sup>b,c,d</sup> |
| Memory LB            | 33.7±12.5 | 18.3±3.85 | 7.76±3.15 | <0.001 <sup>b,c,d</sup> |
| LB MZ                | 14.5±7.82 | 7.96±3.83 | 3.31±1.40 | <0.001 <sup>c,d</sup>   |
| LB NCS               | 13.7±7.11 | 7.05±3.22 | 4.40±3.62 | <0.001 <sup>b,c</sup>   |
| LB CS                | 17.7±6.32 | 9.75±4.47 | 2.95±1.76 | <0.001 <sup>b,c,d</sup> |
| Plasmablasts         | 3.02±1.47 | 1.12±0.74 | 0.27±0.17 | <0.001 <sup>b,c,d</sup> |
| Transitional LB      | 1.42±2.53 | 0.85±0.74 | 4.29±7.06 | 0.176                   |

LB, Lymphocytes B; MZ; Marginal Zone; NCS, No *Class-Switched*; CS, *Class-Switched*. Data expressed as median± standard deviation. <sup>a</sup> Comparisons performed by the Kruskal-Wallis tests. Values *P*<0.05 were considered statistically significant. <sup>b</sup> Differences between cluster A1 and the A2. <sup>c</sup> Differences between cluster A1 and A3. <sup>d</sup> Differences between cluster A2 and the A3.

**Table 2.** Cluster B lymphocyte levels at three months post-transplant.

| Subpopulations       | Cluster   |           |           | <i>P</i> <sup>a</sup>       |
|----------------------|-----------|-----------|-----------|-----------------------------|
|                      | B1 (%)    | B2 (%)    | B3 (%)    |                             |
| <b>B Lymphocytes</b> | 6.15±4.16 | 12.4±13.4 | 7.56±3.68 | 0.549                       |
| Naive LB             | 46.7±8.73 | 67.9±6.93 | 68.2±9.05 | <0.001 <sup>b,c</sup>       |
| Memory LB            | 38.5±7.11 | 21.1±2.50 | 17.0±6.62 | <0.001 <sup>b,c</sup>       |
| LB MZ                | 16.5±4.82 | 11.5±4.28 | 6.43±2.96 | <0.001 <sup>c,d</sup>       |
| LB NCS               | 17.4±4.53 | 11.1±3.70 | 6.58±2.85 | <0.001 <sup>c</sup>         |
| LB CS                | 19.6±7.07 | 8.54±3.45 | 9.60±4.86 | <b>0.001</b> <sup>b,c</sup> |
| Plasmablasts         | 2.31±1.33 | 2.94±2.14 | 0.91±0.71 | <b>0.005</b> <sup>c,d</sup> |
| Transitional LB      | 0.51±0.69 | 1.27±0.84 | 0.37±0.33 | <b>0.012</b> <sup>b,d</sup> |

Abbreviations: LB, Lymphocytes B; MZ; Marginal Zone; NCS, No *Class-Switched*; CS, *Class-Switched*. Data expressed as median± SEM. <sup>a</sup> Comparisons performed by the Kruskal-Wallis tests. <sup>b</sup> Differences between cluster B1 and the B2. <sup>c</sup> Differences between cluster B1 and the B3. <sup>d</sup> Differences between cluster B2 and the B3. Values *P*<0.05 were considered statistically significant and indicated in bold.

**Table 3.** Cluster B lymphocyte levels at six months post-transplant.

| Subpopulations       | Cluster   |           |           | <i>P</i> <sup>a</sup>       |
|----------------------|-----------|-----------|-----------|-----------------------------|
|                      | C1 (%)    | C2 (%)    | C3 (%)    |                             |
| <b>B Lymphocytes</b> | 4.63±2.17 | 4.05±2.09 | 8.47±4.67 | <b>0.008</b> <sup>c,d</sup> |
| Naive LB             | 48.9±13.0 | 57.4±9.36 | 72.0±8.13 | <0.001 <sup>c,d</sup>       |
| Memory LB            | 36.6±10.1 | 23.3±4.87 | 16.5±3.55 | <0.001 <sup>c</sup>         |
| LB MZ                | 19.0±4.62 | 6.40±2.65 | 8.04±2.60 | <0.001 <sup>b,c</sup>       |
| LB NCS               | 18.0±4.00 | 5.89±2.38 | 7.99±3.00 | <0.001 <sup>b,c</sup>       |
| LB CS                | 15.9±9.90 | 16.1±5.06 | 7.72±3.55 | <b>0.001</b> <sup>c,d</sup> |
| Plasmablasts         | 1.93±2.70 | 2.76±1.46 | 0.95±0.74 | <b>0.005</b> <sup>d</sup>   |
| Transitional LB      | 0.56±0.72 | 1.56±2.47 | 0.30±0.35 | 0.593                       |

LB, Lymphocytes B; MZ; Marginal Zone; NCS, No *Class-Switched*; CS, *Class-Switched*. Data expressed as median± SEM. <sup>a</sup> Comparisons performed by the Kruskal-Wallis test. Values *p*<0.05 are considered statistically significant and are indicated in bold. <sup>b</sup> Differences between the cluster C1 and the C2. <sup>c</sup> Differences between cluster C1 and the C3. <sup>d</sup> Differences between the cluster C2 and the C3.

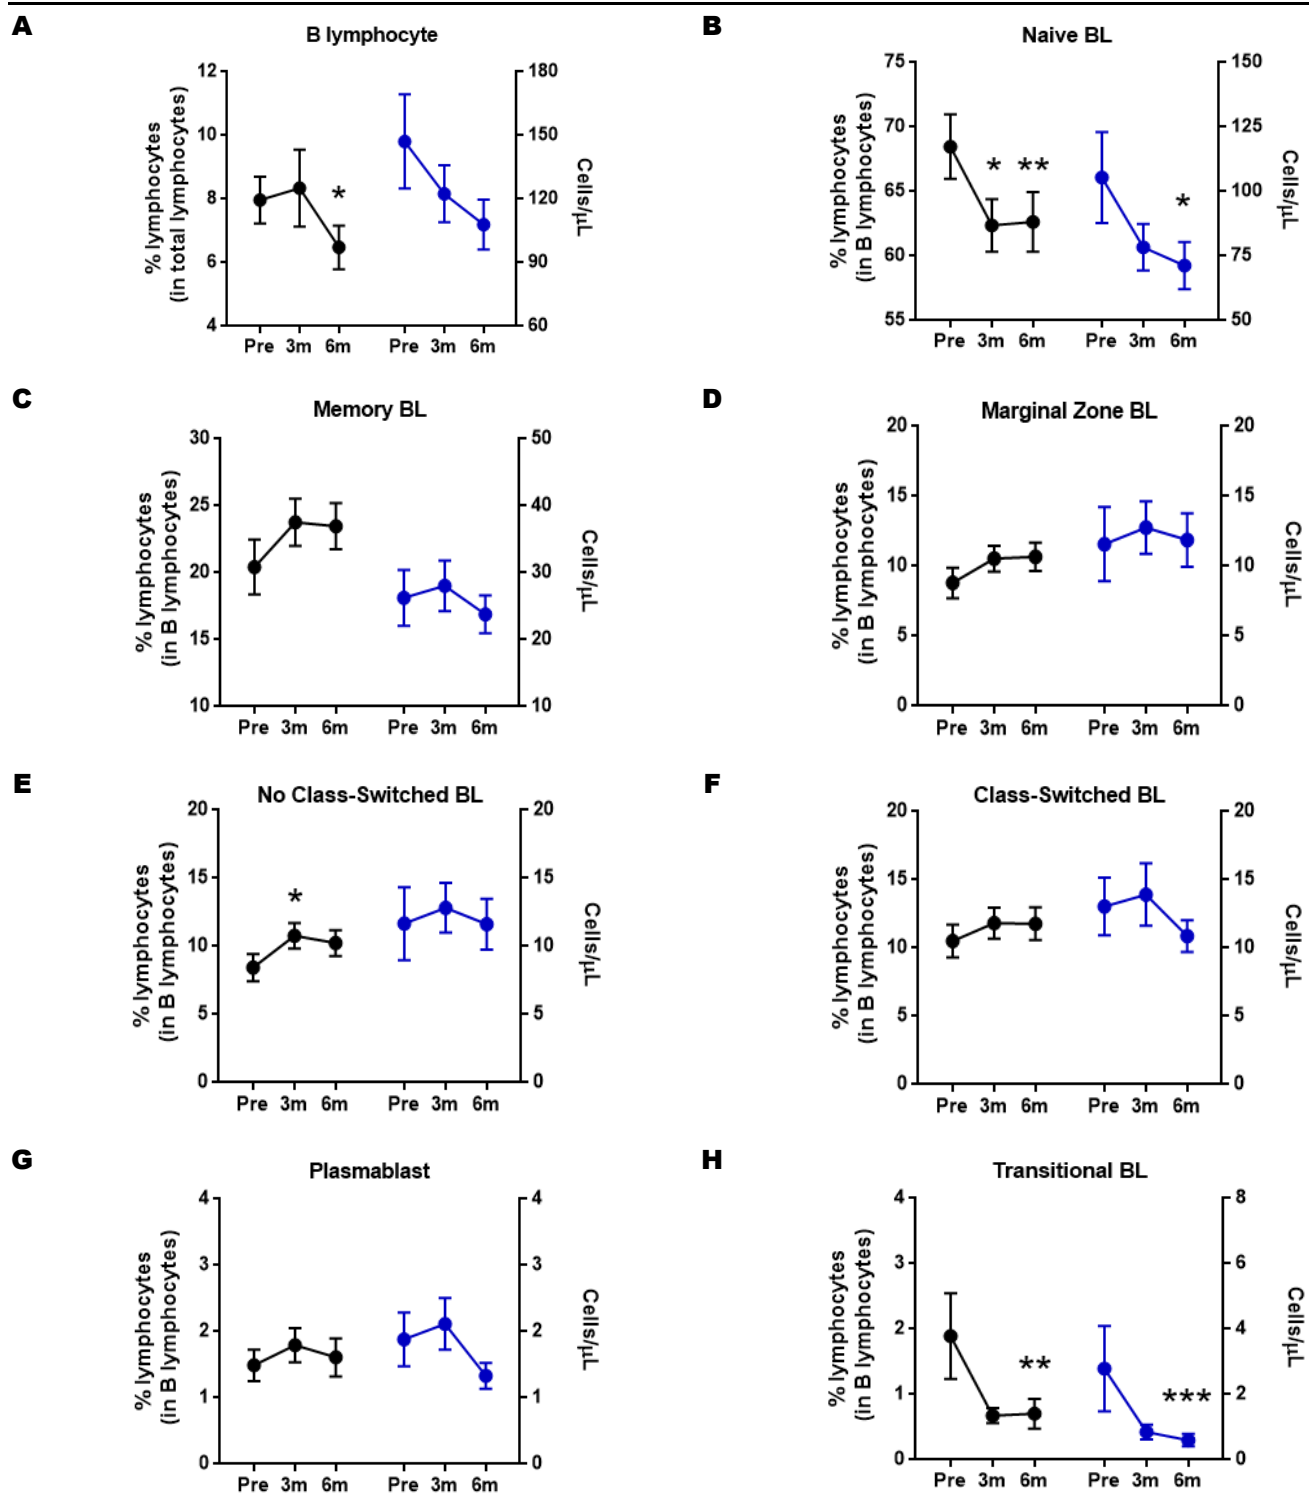

**Figure 1.** Monitoring of subtypes of B lymphocytes in kidney transplant patients. The relative frequencies (black) and the absolute values (blue) of the B lymphocyte subpopulations were re-presented at pre-transplant, 3 m, and 6 m and compared at three months (3 m) and six months (6 m) post-transplantation to pre-transplantation (pre) using the Wilcoxon test for paired samples. Values of  $p < 0.05$  were considered statistically significant. \*  $p < 0.05$ ; \*\*  $p < 0.01$ ; \*\*\*  $p < 0.001$ .

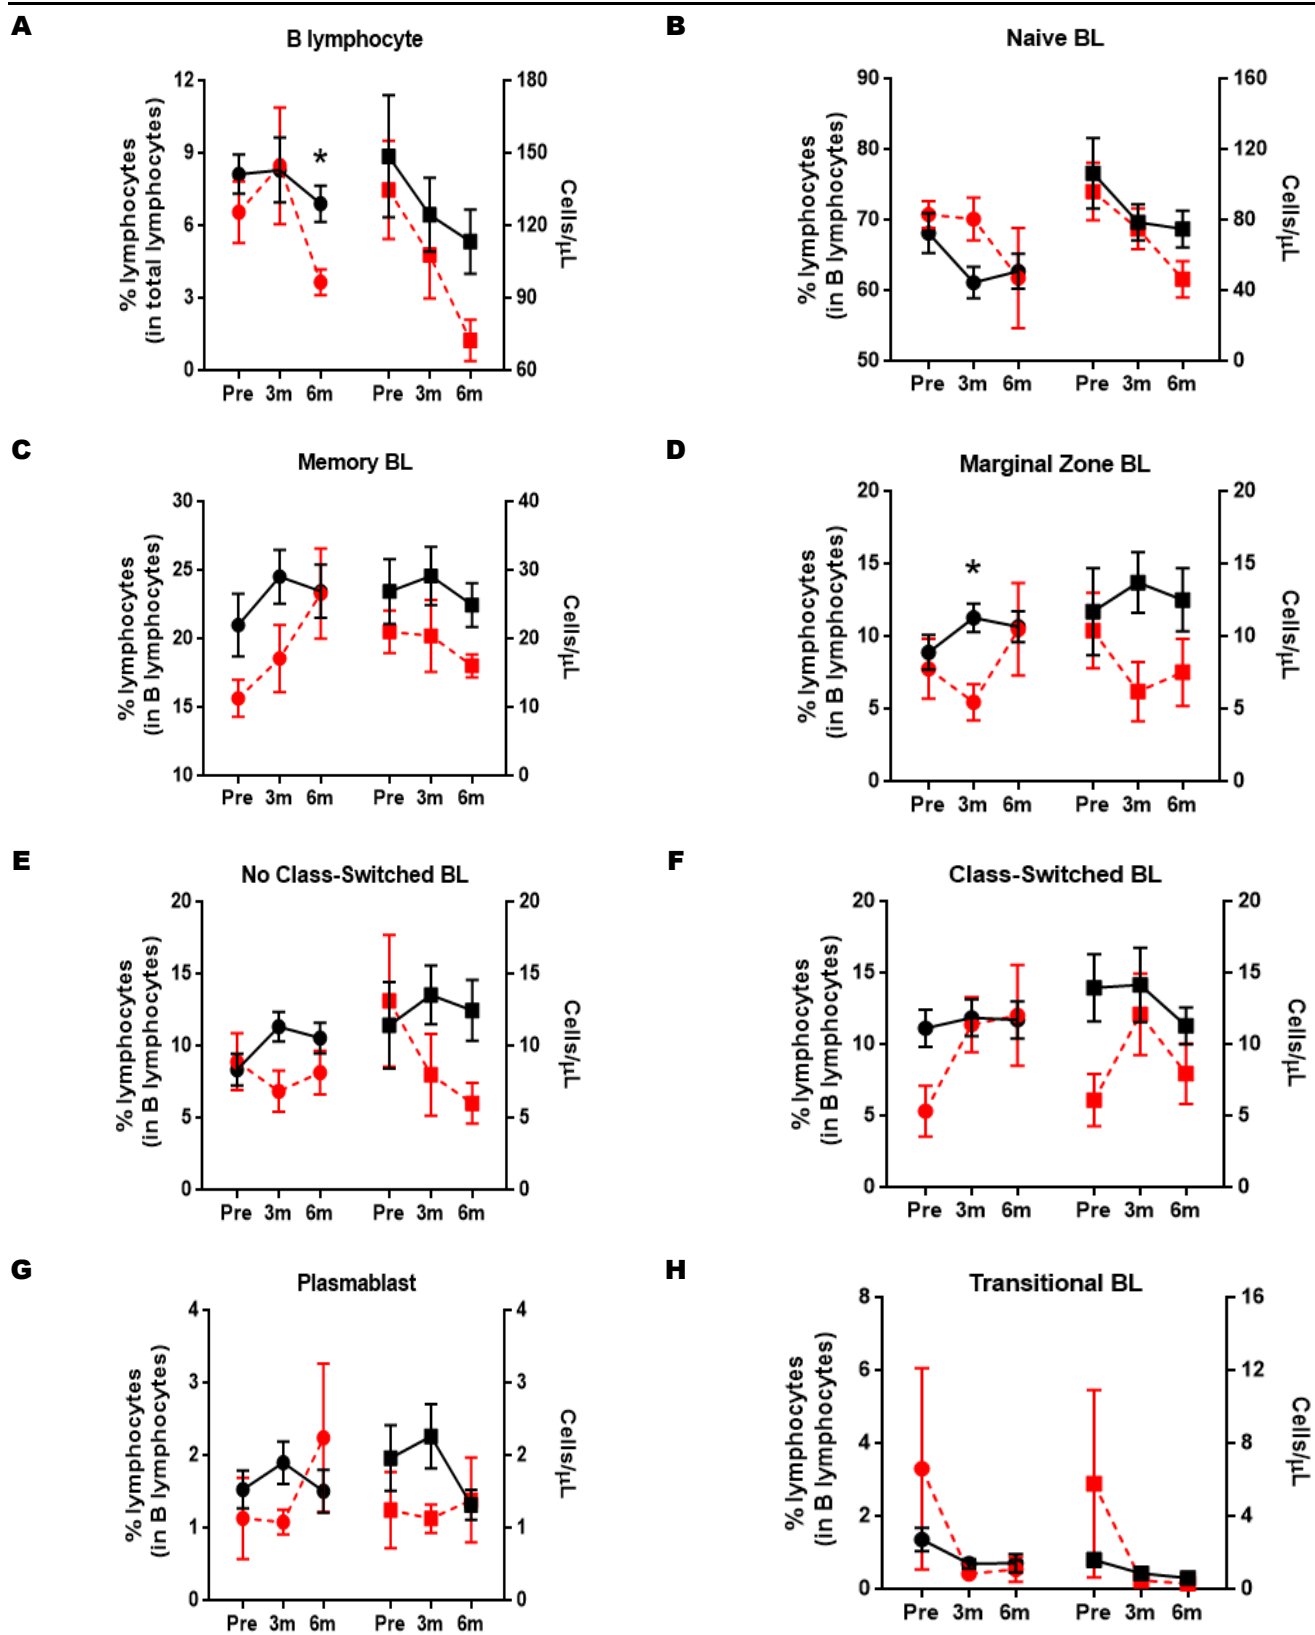

**Figure S2.** Monitoring of B lymphocytes in RTRs suffering acute rejection. The relative frequencies (left axis) and Table 0. were considered statistically significant. \*  $p < 0.05$ .

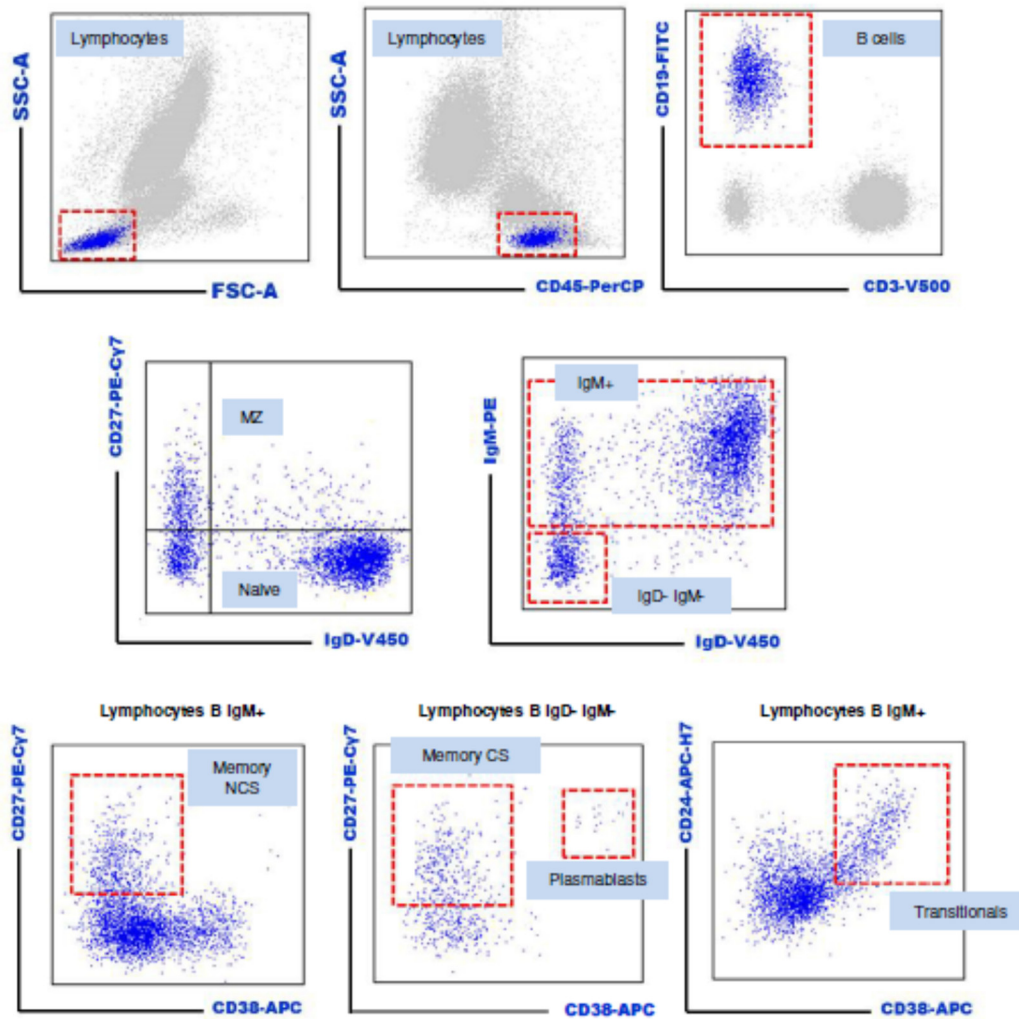

**Figure 3.** Analysis strategy of B lymphocyte subpopulations. First, lymphocytes were selected from the in-tersection between the FSC/SSC low and SSC low/CD45<sup>++</sup> region. B lymphocytes were defined as those lymphocytes with a CD3<sup>-</sup>CD19<sup>+</sup> phenotype. The different B lymphocyte subpopulations were then defined using CD24, CD27, CD38, IgD, and IgM. Abbreviations: NCS, No Class-Switched; CS, Class-switched; MZ, Marginal zone.

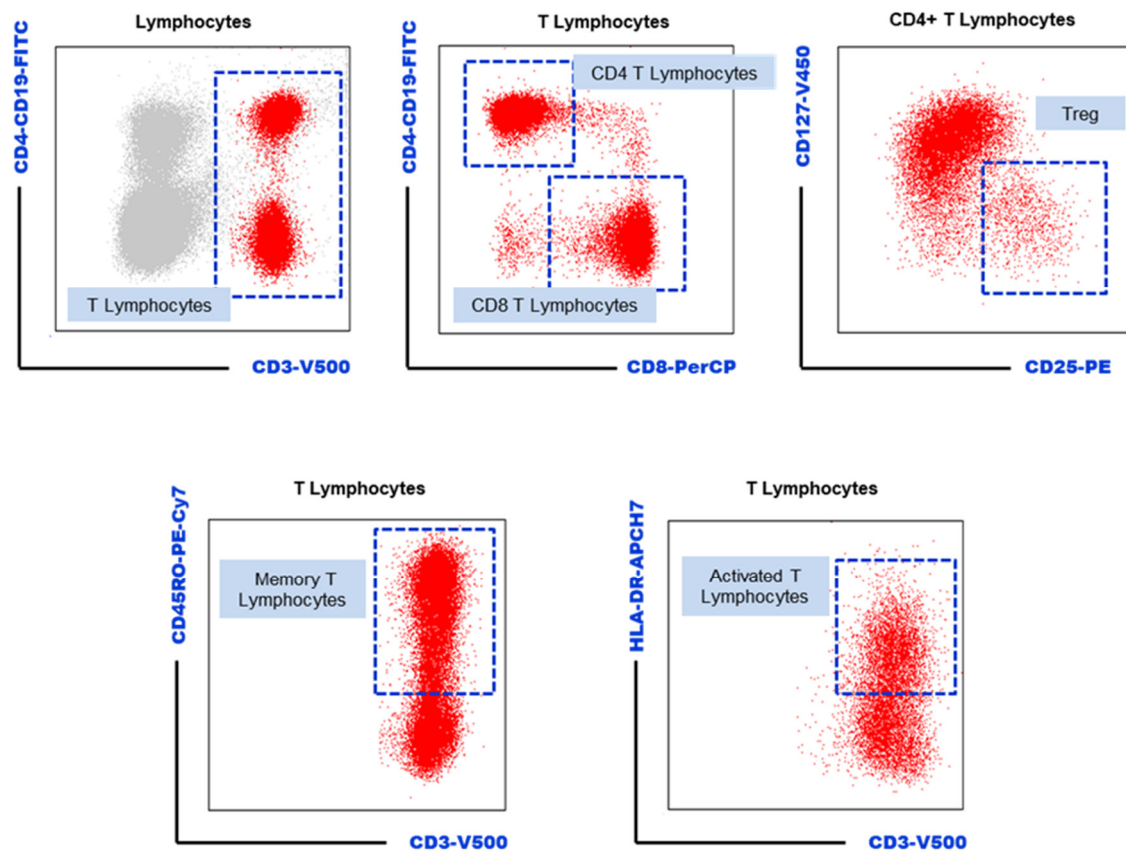

**Figure 4.** T-lymphocyte subpopulation analysis strategy. Lymphocytes were selected in the FSC/SSC low region (Not shown in the figure). T lymphocytes were defined as those lymphocytes with a CD3+ CD19- phenotype. The T lymphocytes were then selected based on the expression of CD4 or CD8. Regulatory T lymphocytes (Treg) were selected as those CD4 T lymphocytes with a CD127<sup>low</sup>CD25<sup>++</sup> phenotype. Memory and activated T cells were selected based on the expression of CD45RO and HLA-DR, respectively.
